# Supplementary material for: Photophysical investigation of two emissive nucleosides exhibiting gigantic stokes shifts
Source: Royal Society of Chemistry journal article supplement (doi:10.1039/c9pp00172g), 2019-06-17
Supplement: c9pp00172g1.pdf [file c9pp00172g1.pdf]

Electronic Supporting Information

**Photophysical Investigation of Two Emissive Nucleosides Exhibiting Gigantic Stokes Shifts**

J. Stendevad<sup>a</sup>, M. Hornum<sup>a</sup>, D. Wüstner<sup>b</sup> and J. Kongsted<sup>a\*</sup>

<sup>a</sup>Department of Physics, Chemistry and Pharmacy, University of Southern Denmark, DK-5230 Odense M, Denmark

<sup>b</sup>Department of Biochemistry and Molecular Biology, University of Southern Denmark, DK-5230 Odense M, Denmark

\*E-mail: kongsted@sdu.dk

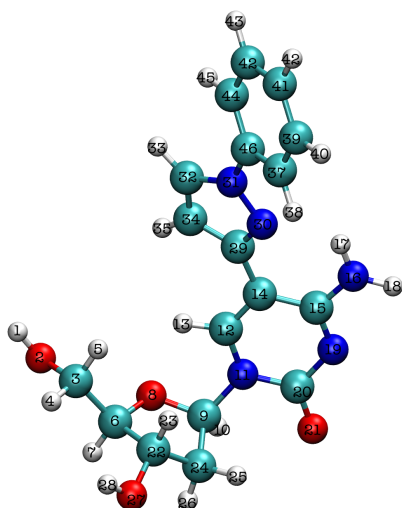

| Atom number | Atom name | Atom type | Charge    |
|-------------|-----------|-----------|-----------|
| 1           | HO5'      | HO        | 0.473993  |
| 2           | O5'       | OH        | -0.770348 |
| 3           | C5'       | CI        | 0.250576  |
| 4           | H5'       | H1        | 0.024864  |
| 5           | H5''      | H1        | 0.024864  |
| 6           | C4'       | CT        | 0.263568  |
| 7           | H4'       | H1        | 0.043960  |
| 8           | O4'       | OS        | -0.633003 |
| 9           | C1'       | CT        | 0.528779  |
| 10          | H1'       | H2        | 0.064454  |
| 11          | N1        | N*        | -0.535041 |
| 12          | C6        | CM        | 0.330269  |
| 13          | H6        | H4        | 0.167746  |
| 14          | C5        | CM        | -0.775230 |
| 15          | C4        | CA        | 1.229087  |
| 16          | N4        | N2        | -1.181323 |
| 17          | H41       | H         | 0.480702  |
| 18          | H42       | H         | 0.480702  |
| 19          | N3        | NC        | -1.087081 |
| 20          | C2        | C         | 1.220941  |
| 21          | O2        | O         | -0.783015 |
| 22          | C3'       | CT        | 0.550780  |
| 23          | H3'       | H1        | -0.029535 |
| 24          | C2'       | CT        | -0.382145 |
| 25          | H2'       | HC        | 0.115065  |
| 26          | H2''      | HC        | 0.129704  |
| 27          | O3'       | OH        | -0.881779 |
| 28          | HO3'      | HO        | 0.499459  |
| 29          | C1py      | cc        | 0.611178  |
| 30          | N1py      | nd        | -0.490978 |
| 31          | N2py      | na        | 0.085730  |
| 32          | C2py      | cd        | -0.047969 |
| 33          | H2py      | ha        | 0.171579  |
| 34          | C3py      | cc        | -0.524713 |
| 35          | H3py      | ha        | 0.257062  |
| 36          | C1ph      | ca        | 0.210468  |
| 37          | C2ph      | ca        | -0.236806 |
| 38          | H2ph      | ha        | 0.159077  |
| 39          | C3ph      | ca        | -0.088375 |
| 40          | H3ph      | ha        | 0.143872  |
| 41          | C4ph      | ca        | -0.202818 |
| 42          | H4ph      | ha        | 0.153912  |
| 43          | C5ph      | ca        | -0.088375 |
| 44          | H5ph      | ha        | 0.143872  |
| 45          | C6ph      | ca        | -0.236806 |
| 46          | H6ph      | ha        | 0.159077  |

**Table 1** Parameters for X

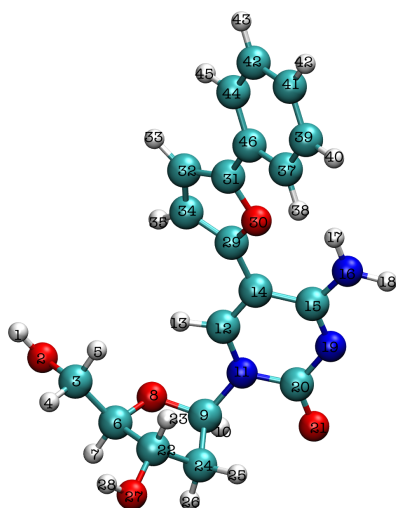

| Atom number | Atom name | Atom type | Charge    |
|-------------|-----------|-----------|-----------|
| 1           | HO5'      | HO        | 0.477441  |
| 2           | O5'       | OH        | -0.767316 |
| 3           | C5'       | CI        | 0.255320  |
| 4           | H5'       | H1        | 0.022485  |
| 5           | H5''      | H1        | 0.022485  |
| 6           | C4'       | CT        | 0.253235  |
| 7           | H4'       | H1        | 0.046924  |
| 8           | O4'       | OS        | -0.621557 |
| 9           | C1'       | CT        | 0.501430  |
| 10          | H1'       | H2        | 0.073491  |
| 11          | N1        | N*        | -0.552469 |
| 12          | C6        | CM        | 0.402904  |
| 13          | H6        | H4        | 0.133124  |
| 14          | C5        | CM        | -0.840701 |
| 15          | C4        | CA        | 1.278848  |
| 16          | N4        | N2        | -1.216603 |
| 17          | H41       | H         | 0.491026  |
| 18          | H42       | H         | 0.491026  |
| 19          | N3        | NC        | -1.101316 |
| 20          | C2        | C         | 1.239734  |
| 21          | O2        | O         | -0.777680 |
| 22          | C3'       | CT        | 0.558666  |
| 23          | H3'       | H1        | -0.028029 |
| 24          | C2'       | CT        | -0.374418 |
| 25          | H2'       | HC        | 0.108342  |
| 26          | H2''      | HC        | 0.132019  |
| 27          | O3'       | OH        | -0.881855 |
| 28          | HO3'      | HO        | 0.499041  |
| 29          | C1fu      | cc        | 0.510022  |
| 30          | O1fu      | os        | -0.273080 |
| 31          | C2fu      | cc        | 0.118953  |
| 32          | C3fu      | cd        | -0.253135 |
| 33          | H3fu      | ha        | 0.207901  |
| 34          | C4fu      | cd        | -0.401707 |
| 35          | H4fu      | ha        | 0.239184  |
| 36          | C1ph      | ca        | 0.080552  |
| 37          | C2ph      | ca        | -0.155245 |
| 38          | H2ph      | ha        | 0.120344  |
| 39          | C3ph      | ca        | -0.121897 |
| 40          | H3ph      | ha        | 0.144495  |
| 41          | C4ph      | ca        | -0.181704 |
| 42          | H4ph      | ha        | 0.152023  |
| 43          | C5ph      | ca        | -0.121897 |
| 44          | H5ph      | ha        | 0.144495  |
| 45          | C6ph      | ca        | -0.155245 |
| 46          | H6ph      | ha        | 0.120344  |

**Table 2** Parameters for Y

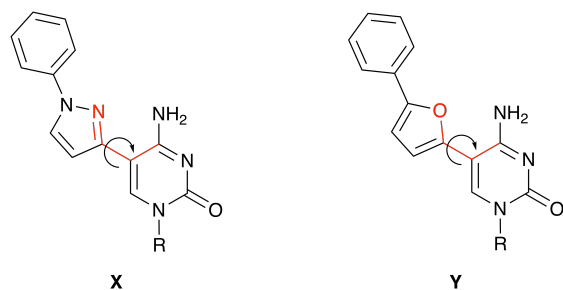

**Figure 1** Illustration of dihedral angle,  $\zeta$ , in nucleosides **X** (left) and **Y** (right).

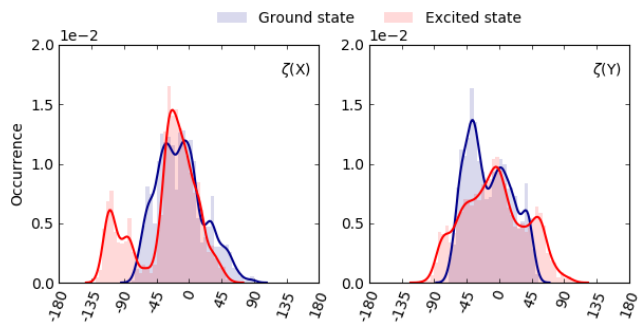

**Figure 2** Histogram showing the distribution of dihedral angle,  $\zeta$ , in nucleosides **X** (left) and **Y** (right) over the ground and excited state trajectories (water).

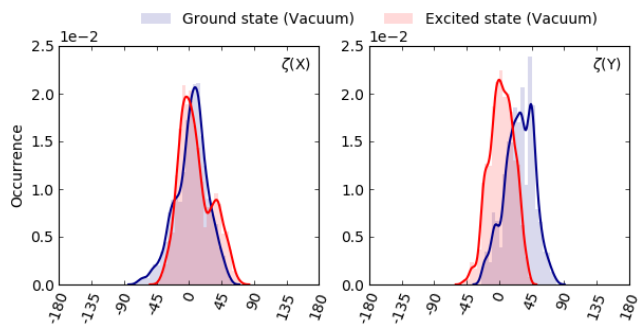

**Figure 3** Histogram showing the distribution of dihedral angle,  $\zeta$ , in nucleosides **X** (left) and **Y** (right) over the ground and excited state trajectories (vacuum).

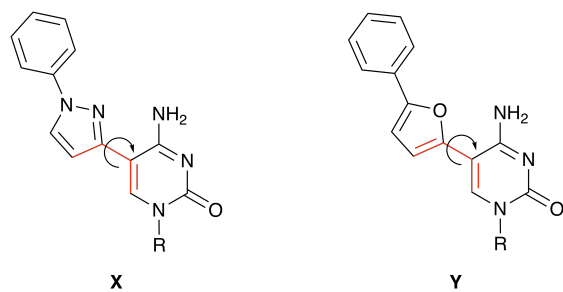

**Figure 4** Illustration of dihedral angle,  $\theta$  in nucleosides **X** (left) and **Y** (right).

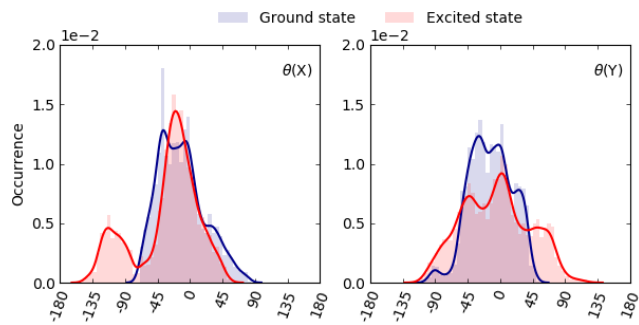

**Figure 5** Histogram showing the distribution over the ground and excited state trajectories (water) of dihedral angle  $\theta$  in nucleosides **X** (left) and **Y** (right).

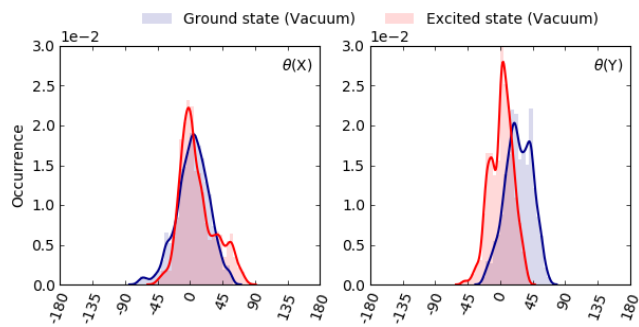

**Figure 6** Histogram showing the distribution over the ground and excited state trajectories (vacuum) of dihedral angle  $\theta$  in nucleosides **X** (left) and **Y** (right).

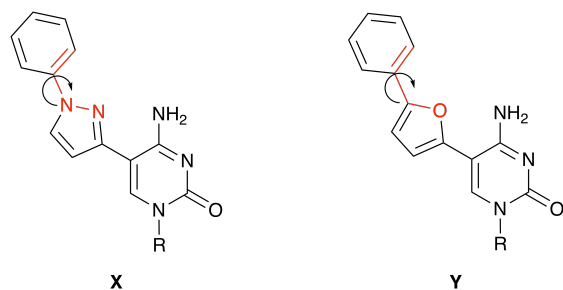

**Figure 7** Illustration of dihedral angle,  $\gamma$  in nucleosides **X** (left) and **Y** (right).

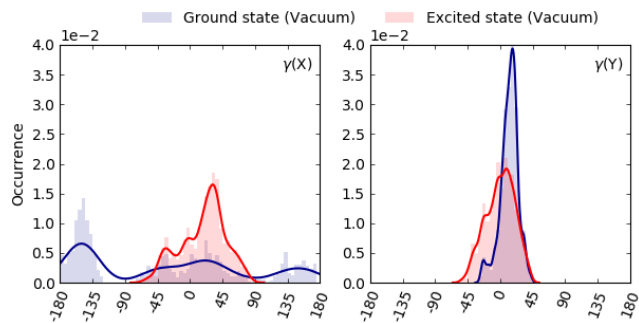

**Figure 8** Histogram showing the distribution over the ground and excited state trajectories (vacuum) of dihedral angle  $\gamma$  in nucleosides **X** (left) and **Y** (right).

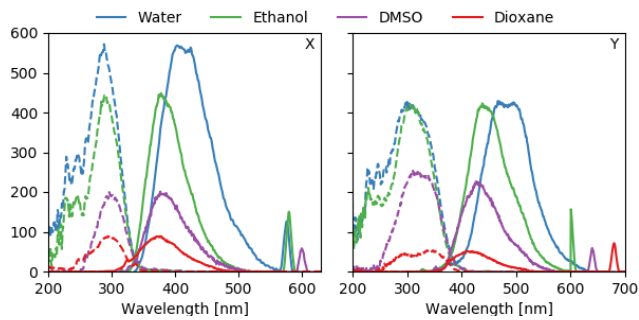

**Figure 9** Measured excitation and emission spectra (Raw data) of nucleoside **X** (left) and **Y** (right) in different solvents. Excitation spectra are shown with dashed lines, whereas the solid lines mark the emission spectra.

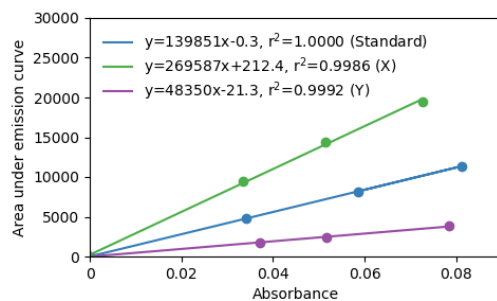

**Figure 10** Linear regressions of absorbance as a function of integrated emission of the respective concentrations of **X** and **Y** as well as the standard sample.

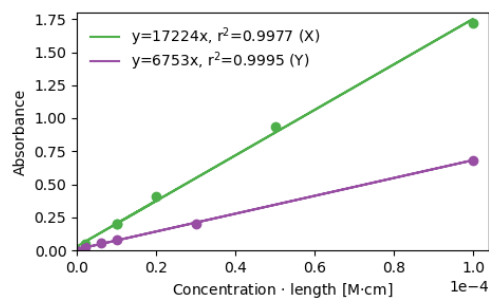

**Figure 11** Linear regressions of absorbance as a function of concentration · length for **X** and **Y**

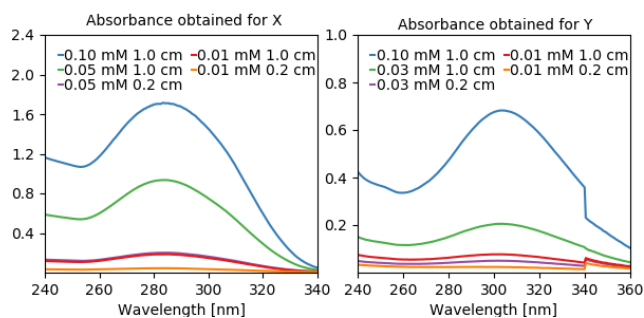

**Figure 12** Absorbance spectra for **X** and **Y** obtained for different concentrations and lengths of cuvettes.
